# Supplementary material for: Epigenetic Regulation of Vascular Smooth Muscle Cells by Histone H3 Lysine 9 Dimethylation Attenuates Target Gene-Induction by Inflammatory Signaling
Source: PubMed Central journal article supplement (PMC6818986; doi:10.1161/atvbaha.119.312765), 2019-08-22
Supplement: atv-39-2289-s002.pdf [file atv-39-2289-s002.pdf]

## Major Resources Tables

### Animals (all mouse)

#### Allele information

| Allele                                            | Source                                                             | Background Strain        | MGI         |
|---------------------------------------------------|--------------------------------------------------------------------|--------------------------|-------------|
| Apoe <sup>-/-</sup>                               | Charles River                                                      | C57Bl/6                  | MGI:1857129 |
| Myh11-Cre <sup>ERT2</sup><br>(Y-linked transgene) | Offermans lab (Wirth A et al., 2008. Nat Medicine. 14, 64-8)       | C57Bl/6                  | MGI:3819270 |
| Rosa26-Confetti                                   | Hans Clevers (Basak et al., 2014. The EMBO Journal 33, 2057–2068.) | C57Bl/6 (>5 backcrosses) | MGI:4835542 |
| Rosa26-EYFP                                       | Jackson Labs                                                       | C57Bl/6                  | MGI:2449038 |

#### Experimental animals

| Allele                                                 | Vendor or Source  | Background Strain        | Sex                                        |
|--------------------------------------------------------|-------------------|--------------------------|--------------------------------------------|
| Apoe <sup>-/-</sup> ; Myh11-CreERT2; Rosa26-Confetti/+ | In house breeding | C57Bl/6 (>5 backcrosses) | Male (Myh11-CreERT2 transgene is Y-linked) |
| Myh11-CreERT2; Rosa26-Confetti/+                       | In house breeding | C57Bl/6 (>5 backcrosses) | Male (Myh11-CreERT2 transgene is Y-linked) |
| Myh11-CreERT2; Rosa26-EYFP/EYFP                        | In house breeding | C57Bl/6                  | Male (Myh11-CreERT2 transgene is Y-linked) |

#### Animal breeding

|                        | Genotype                                       | Vendor or Source  | Background Strain        | Other Information |
|------------------------|------------------------------------------------|-------------------|--------------------------|-------------------|
| <b>Parent - Male</b>   | Apoe <sup>-/-</sup> , Myh11-CreERT2+           | In house breeding | C57Bl/6                  |                   |
| <b>Parent - Female</b> | Apoe <sup>-/-</sup> , Rosa26-Confetti/Confetti | In house breeding | C57Bl/6 (>5 backcrosses) |                   |

|                        |                          |                   |                          |  |
|------------------------|--------------------------|-------------------|--------------------------|--|
| <b>Parent - Male</b>   | Myh11-CreERT2+           | In house breeding | C57Bl/6                  |  |
| <b>Parent - Female</b> | Rosa26-Confetti/Confetti | In house breeding | C57Bl/6 (>5 backcrosses) |  |

|                        |                                  |                   |         |  |
|------------------------|----------------------------------|-------------------|---------|--|
| <b>Parent - Male</b>   | Myh11-CreERT2+; Rosa26-EYFP/EYFP | In house breeding | C57Bl/6 |  |
| <b>Parent - Female</b> | Rosa26-EYFP/EYFP                 | In house breeding | C57Bl/6 |  |

## Antibodies

| Target antigen                                              | Vendor or Source | Catalog #    | Working concentration                   |
|-------------------------------------------------------------|------------------|--------------|-----------------------------------------|
| G9A                                                         | R&D Systems      | PP-A8620A-00 | 2 µg/ml (WB)                            |
| H3K9me2                                                     | Abcam            | ab12220      | 1 µg/ml (WB), 6.7 µg/ml (ChIP)          |
| H3K9me2 (Alexa Fluor 647)                                   | Abcam            | ab203851     | 10 µg/ml (IF)                           |
| IκBα                                                        | Cell Signalling  | 4814         | 1:1000 (WB concentration not provided)  |
| NFκB-p65                                                    | Santa Cruz       | sc-372       | 1 µg/ml (WB, IF)                        |
| NFκB-p65                                                    | Diagenode        | C15310256    | 1 µl/ChIP (concentration not provided)  |
| NFκB-p65 (Ser536)                                           | Cell Signaling   | 3033         | 1:100 (WB, concentration not provided)  |
| cJUN                                                        | Abcam            | ab31419      | 1 µg/ml (WB), 5 µg/ChIP                 |
| p-cJUN (Ser63)                                              | Abcam            | ab32385      | 0.1 µg/ml (WB)                          |
| p-JNK (Thr183/Tyr185)                                       | Cell Signaling   | 4668         | 1:1000 (WB, concentration not provided) |
| p-ERK1/2 (Thr202/Tyr204)                                    | Cell Signaling   | 9101         | 1:1000 (WB, concentration not provided) |
| p-p38 (Thr180/Tyr182)                                       | Cell Signaling   | 9211         | 1:1000 (WB, concentration not provided) |
| β-Actin                                                     | Sigma-Aldrich    | A2228        | 0.1 µg/ml (WB)                          |
| β-Tubulin                                                   | Cell Signaling   | 2146         | 1:1000 (WB, concentration not provided) |
| Anti-rabbit IgG, HRP linked                                 | Cell Signaling   | 7074         | 1:5000 (WB, concentration not provided) |
| Anti-mouse IgG, HRP linked                                  | Cell Signaling   | 7076         | 1:5000 (WB, concentration not provided) |
| Goat Anti-Rabbit IgG (Alexa Fluor 488)                      | Abcam            | ab150077     | 1:1000 (concentration not provided)     |
| Mouse IgG2a [MOPC-173] (Alexa Fluor® 647) - Isotype Control | Abcam            | ab239458     | 10 µg/ml (IF)                           |
| Rabbit IgG                                                  | Agilent          | X090302-8    | 6.7 µg/ml (ChIP), 1 µg/ml (IF)          |

## Cultured Cells

| Name            | Vendor or Source                                                            | Sex (F, M, or unknown) |
|-----------------|-----------------------------------------------------------------------------|------------------------|
| WT murine VSMCs | Primary culture setup from C57Bl/6 animals purchased from Charles River)    | Males                  |
| Human VSMC      | Primary culture (used in Figures 5B, 5C, 5E, 5F)                            | M (20 years)           |
| Human VSMC      | Primary culture (used in Figures 5B, 5C, 5E, 5F)                            | F (33 years)           |
| Human VSMC      | Primary culture (used in Figures 5B, 5C, 5E, 5F and Supplemental Figure 6B) | M (56 years)           |

|            |                                                                                             |              |
|------------|---------------------------------------------------------------------------------------------|--------------|
| Human VSMC | Primary culture (used in Figures 5B, 5C, 5E, 5F and Supplemental Figure 4A, 4B and 5B)      | F (64 years) |
| Human VSMC | Primary culture (used in Figures 5C, 5D and Supplemental Figures and 6A, 7A, 7B and 7C)     | M (32 years) |
| Human VSMC | Primary culture (used in Figures 5A, 5C, 5D, 6C and Supplemental Figures 6A, 6C, 7A and 7C) | M (44 years) |
| Human VSMC | Primary culture (used in Figures 5A, 5C, 5D, 6B, 6C and Supplemental Figures 6A)            | F (71 years) |
| Human VSMC | Primary culture (used in Figures 5A, 5C and Supplemental Figures 7A, 7B and 7C)             | F (77 years) |
| Human VSMC | Primary culture (used in Figure 5A, 5C and Supplemental Figures 4A, 4B and 7A)              | M (53 years) |
| Human VSMC | Primary culture (used in Figure 5A and Supplemental Figures 4A and 4B)                      | M (66 years) |
| Human VSMC | Primary culture (used in Figure 5A and Supplemental Figures 4A and 4B)                      | M (78 years) |
| Human VSMC | Primary culture (used in Figures 6B, 6D and Supplemental Figures 5B, 5C, 6C and 6D)         | M (41 years) |
| Human VSMC | Primary culture (used in Figures 6B, 6D and Supplemental Figure 5B 5C, 6C and 6D)           | F (53 years) |
| Human VSMC | Primary culture (used in Figures 5C, 6B, 6D and Supplemental Figures 5C and 6D)             | M (45 years) |
| Human VSMC | Primary culture (used in Figures 6C, 6D and Supplemental Figure 6C)                         | M (69 years) |
| Human VSMC | Primary culture (used in Figure 6C and Supplemental Figure 6B)                              | M (77 years) |

## Reagents

| Name                                         | Vendor or Source |            | Working Concentration                         |
|----------------------------------------------|------------------|------------|-----------------------------------------------|
| SP600125                                     | Abcam            | ab120065   | 10 $\mu$ M                                    |
| UNC0638                                      | Tocris/Sigma     | 4343/U4885 | 1 $\mu$ M                                     |
| A366                                         | Tocris           | 5163       | 1 $\mu$ M                                     |
| IL-1 $\alpha$                                | Peprtech         | 210-10     | 2 ng/ml                                       |
| TNF- $\alpha$                                | Peprtech         | 300-01A    | 90 ng/ml                                      |
| siRNA (G9A)                                  | Santa cruz       | sc-43777   | 90 ng/ml                                      |
| siRNA (Control)                              | Santa cruz       | sc-37007   | 90 ng/ml                                      |
| HiPerfect                                    | Qiagen           | 301704     | NA                                            |
| DQ Gelatin                                   | Thermo Fisher    | D12054     | 50 $\mu$ g/ml (1 ml per 9.5 cm <sup>2</sup> ) |
| Osmotic pump                                 | Alzet            | 2002       | NA                                            |
| iDeal ChIP-seq Kit for Transcription Factors | Diagenode        | c01010054  | NA                                            |
